# Supplementary material
Source: publisher figshare collection journal article supplement (https://sage.figshare.com/ndownloader/files/12738629)
Supplement: Supplementary file 1 [file 12738629]

## Appendix I. Item types and sample items.

### I The plural feature

**Table 1.** Item types and sample items for the two plural suffixes.

|               | -men          | -xie         |
|---------------|---------------|--------------|
| Grammatical   | N-men (1a)    | D-xie N (1c) |
| Ungrammatical | *D-men N (1b) | *N-xie (1d)  |

- (1) a. Plural marking of *-men* on a noun (grammatical)  
 Haizi-**men** hen tiaopi.  
 Child-PL very naughty  
 ‘The children are very naughty.’
- b. Plural marking of *-men* on a demonstrative (ungrammatical)  
 \*Na-**men** haizi hen tiaopi.  
 That-PL child very naughty  
 ‘Those children are very naughty.’
- c. Plural marking of *-xie* on a demonstrative (grammatical)  
 Na-**xie** haizi hen tiaopi.  
 That-PL child very naughty  
 ‘Those children are very naughty.’
- d. Plural marking of *-xie* on a noun (ungrammatical)  
 \*Haizi-**xie** hen tiaopi.  
 Child-PL very naughty  
 ‘The children are very naughty.’

**Table 2.** Item types and sample items for different contexts of plural marking.

|    | Control:<br>Singular in<br>L1 & L2 | *Obligatory<br>plural marking<br>on nouns in L1 | Obligatory plural<br>marking on<br>demonstratives in L2 | Optional plural<br>marking on nouns<br>in L2 | Filler            |
|----|------------------------------------|-------------------------------------------------|---------------------------------------------------------|----------------------------------------------|-------------------|
| Gr | D N (2a)                           | -----                                           | D-xie N (2c)<br>((1c) in Table 1)                       | D-xie N-men (2d)                             | -----             |
| Un | -----                              | *D N-men (2b)                                   | -----                                                   | -----                                        | *D-men N-men (2e) |

- (2) a. Control: singular (grammatical)  
 Na haizi hen tiaopi.  
 That child very naughty  
 ‘That child is very naughty.’
- b. Lack of plural marking on a demonstrative (ungrammatical)  
 \*Na haizi-**men** hen tiaopi.  
 That child-PL very naughty  
 ‘Those children are very naughty.’
- c. Obligatory plural marking on a demonstrative (grammatical)  
 Na-**xie** haizi hen tiaopi.  
 That-PL child very naughty  
 ‘Those children are very naughty.’

d. Optional plural marking on a noun (grammatical)

Na-**xie** haizi-**men** hen tiaopi.

That-PL child-PL very naughty

‘Those children are very naughty.’

e. Filler (ungrammatical)

\* Na-**men** haizi-**men** hen tiaopi.

That-PL child-PL very naughty

‘Those children are very naughty.’

## 2 The human feature

**Table 3.** Item types and sample items for different classifiers co-occurring with human nouns.

| Numeral CI N <sub>[+human]</sub> (numeral = 1) |                             |                 |                                |                                |
|------------------------------------------------|-----------------------------|-----------------|--------------------------------|--------------------------------|
| Gr                                             | Cl <sub>[+human]</sub> (3a) | General CI (3b) | -----                          | -----                          |
| Un                                             | -----                       | -----           | *Cl <sub>[+animate]</sub> (3c) | *Cl <sub>[-animate]</sub> (3d) |

(3) a. A human noun with a human classifier (grammatical)

Yi **ming** jingcha zai gongzuo.

One CL policeman be work

‘A policeman is working.’

b. A human noun with the general classifier (grammatical)

Yi **ge** jingcha zai gongzuo.

One CL policeman be work

‘A policeman is working.’

c. A human noun with an animate classifier (ungrammatical)

\* Yi **zhi** jingcha zai gongzuo.

One CL policeman be work

‘A policeman is working.’

d. A human noun with an inanimate classifier (ungrammatical)

\* Yi **ben** jingcha zai gongzuo.

One CL policeman be work

‘A policeman is working.’

**Table 4.** Item types and sample items for plural marking of *-men* on different nouns.

| N-men |                                                 |                               | Filler: N                     |                              |
|-------|-------------------------------------------------|-------------------------------|-------------------------------|------------------------------|
| Gr    | N <sub>[+human]</sub> (4a)<br>((1a) in Table 1) | -----                         | N <sub>[+animate]</sub> (4d)  | N <sub>[-animate]</sub> (4e) |
| Un    | -----                                           | *N <sub>[+animate]</sub> (4b) | *N <sub>[-animate]</sub> (4c) | -----                        |

(4) a. A human noun suffixed with *-men* (grammatical)

Haizi-**men** hen tiaopi.

Child-PL very naughty

‘The children are very naughty.’

b. An animate noun suffixed with *-men* (ungrammatical)

\* Ying-**men** zai feixiang.

Eagle-PL be fly

‘The eagles are flying.’

- c. An inanimate noun suffixed with *-men* (ungrammatical)  
 \* Lou-**men** hen gao.  
 Building-PL very tall  
 ‘The buildings are very tall.’
- d. Filler: an animate noun (grammatical)  
 Ying zai feixiang.  
 Eagle be fly  
 ‘The eagle/an eagle is flying//eagles are flying.’
- e. Filler: an inanimate noun (grammatical)  
 Lou hen gao.  
 Building very tall  
 ‘The building/a building is very tall//buildings are very tall.’

**Table 5.** Item types and sample items for the co-occurrence restriction of classifiers and *-men*.

| Numeral CI N <sub>[+human]</sub> (numeral > 1) |                             | *Numeral CI N <sub>[+human]</sub> - <i>men</i> (numeral > 1) |                                                    |
|------------------------------------------------|-----------------------------|--------------------------------------------------------------|----------------------------------------------------|
| Gr                                             | Cl <sub>[+human]</sub> (5a) | General CI (5b)                                              | -----                                              |
| Un                                             | -----                       | -----                                                        | *Cl <sub>[+human]</sub> (5c)      *General CI (5d) |

- (5) a. A human noun with a human classifier (grammatical)  
 Si **ming** yudongyuan zai benpao.  
 Four CL athlete be run  
 ‘Four athletes are running.’
- b. A human noun with the general classifier (grammatical)  
 Qi **ge** yisheng zai zuo shoushu.  
 Seven CL doctor be do surgery  
 ‘Seven doctors are doing a surgery.’
- c. A *-men* marked human noun with a human classifier (ungrammatical)  
 \* San **ming** yudongyuan-**men** zai benpao.  
 Three CL policem-PL be run  
 ‘Three athletes are running.’
- d. A *-men* marked human noun with the general classifier (ungrammatical)  
 \* Wu **ge** yisheng-**men** zai zuo shoushu.  
 Five CL doctor-PL be do surgery  
 ‘Five doctors are doing a surgery.’

**Table 6.** Item types and sample items for the co-occurrence restriction of classifiers and *-xie*.

| D Numeral CI N (numeral > 1) |                             |                 |                               |                               | *D-xie Numeral CI N (numeral > 1) |                  |                                |                                |
|------------------------------|-----------------------------|-----------------|-------------------------------|-------------------------------|-----------------------------------|------------------|--------------------------------|--------------------------------|
| Gr                           | Cl <sub>[+human]</sub> (6a) | General CI (6b) | Cl <sub>[+animate]</sub> (6c) | Cl <sub>[-animate]</sub> (6d) | -----                             | -----            | -----                          | -----                          |
| Un                           | -----                       | -----           | -----                         | -----                         | *Cl <sub>[+human]</sub> (6e)      | *General CI (6f) | *Cl <sub>[+animate]</sub> (6g) | *Cl <sub>[-animate]</sub> (6h) |

- (6) a. A demonstrative with a human classifier (grammatical)  
 Na jiu **ming** sheyingshi zai paizhao.  
 That nine CL photographer be take-photo  
 ‘Those nine photographers are taking photos.’
- b. A demonstrative with the general classifier (grammatical)

- Zhe ba **ge** kexuejia zai zuo shiyan.  
This eight CL scientist be do experiment  
'These eight scientists are doing an experiment.'
- c. A demonstrative with an animate classifier (grammatical)  
Zhe san **zhi** ying zai feixiang.  
This three CL eagle be fly  
'These three eagles are flying.'
- d. A demonstrative with an inanimate classifier (grammatical)  
Na wu **ke** zhenzhu hen piaoliang.  
That five CL pearl very beautiful  
'Those five pearls are very beautiful.'
- e. A *-xie* marked demonstrative with a human classifier (ungrammatical)  
\* Na-**xie** ba **ming** sheyingshi zai paizhao.  
That-PL eight CL photographer be take-photo  
'Those eight photographers are taking photos.'
- f. A *-xie* marked demonstrative with the general classifier (ungrammatical)  
\* Zhe-**xie** jiu **ge** kexuejia zai zuo shiyan.  
This-PL nine CL scientists be do experiment  
'These nine scientists are doing an experiment.'
- g. A *-xie* marked demonstrative with an animate classifier (ungrammatical)  
\* Zhe-**xie** wu **zhi** ying zai feixiang.  
This-PL five CL eagle be fly  
'These five eagles are flying.'
- h. A *-xie* marked demonstrative with an inanimate classifier (ungrammatical)  
\* Na-**xie** liu **ke** zhenzhu hen piaoliang.  
That-PL six CL pearl very beautiful  
'Those six pearls are very beautiful.'

## Appendix 2.

**Table 7.** Values of means and standard deviations in Figure 1-6.

| Item type             |            | Beginner |      | Intermediate |      | Advanced |      | Native |      |
|-----------------------|------------|----------|------|--------------|------|----------|------|--------|------|
|                       |            | M        | SD   | M            | SD   | M        | SD   | M      | SD   |
| N-men                 | (Figure 1) | 95.2     | 21.6 | 96.2         | 19.2 | 100      | 0    | 100    | 0    |
| *D-men N              | (Figure 1) | 35.4     | 48.1 | 14.1         | 35.0 | 5.41     | 22.8 | 5.22   | 22.3 |
| D-xie N               | (Figure 1) | 85.2     | 35.8 | 89.7         | 30.5 | 67.6     | 47.1 | 89.4   | 31.0 |
| *N-xie                | (Figure 1) | 31.3     | 46.6 | 13.0         | 33.8 | 1.39     | 11.8 | 1.74   | 13.1 |
| D N                   | (Figure 2) | 90.2     | 29.9 | 79.8         | 40.5 | 60.0     | 49.3 | 78.1   | 41.6 |
| *D N-men              | (Figure 2) | 72.3     | 45.0 | 78.4         | 41.5 | 43.2     | 49.9 | 9.57   | 29.5 |
| D-xie N               | (Figure 2) | 85.2     | 35.8 | 89.7         | 30.5 | 67.6     | 47.1 | 89.4   | 31.0 |
| D-xie N-men           | (Figure 2) | 81.3     | 39.3 | 71.8         | 45.3 | 78.7     | 41.2 | 66.1   | 47.6 |
| CL.human N.human      | (Figure 3) | 80.3     | 40.1 | 98.7         | 11.3 | 100      | 0    | 100    | 0    |
| CL.general N.human    | (Figure 3) | 89.9     | 30.4 | 85.7         | 35.2 | 90.7     | 29.3 | 78.3   | 41.4 |
| *CL.animate N.human   | (Figure 3) | 35.9     | 48.3 | 12.2         | 32.9 | 1.37     | 11.7 | 0.87   | 9.33 |
| *CL.inanimate N.human | (Figure 3) | 37.2     | 48.6 | 6.85         | 25.4 | 0        | 0    | 0.87   | 9.33 |
| N.human-men           | (Figure 4) | 95.2     | 21.6 | 96.2         | 19.2 | 100      | 0    | 100    | 0    |
| *N.animate-men        | (Figure 4) | 57.9     | 49.7 | 49.3         | 50.3 | 26.0     | 44.2 | 43.8   | 49.8 |
| *N.inanimate-men      | (Figure 4) | 29.8     | 46.0 | 12.2         | 32.9 | 1.35     | 11.6 | 5.26   | 22.4 |

|                         |            |      |      |      |      |      |      |      |      |
|-------------------------|------------|------|------|------|------|------|------|------|------|
| CL.human N.human        | (Figure 5) | 91.4 | 28.3 | 97.4 | 16.1 | 100  | 0    | 100  | 0    |
| CL.general N.human      | (Figure 5) | 87.7 | 33.1 | 88.3 | 32.3 | 89.3 | 31.1 | 78.4 | 41.4 |
| *CL.human N.human-men   | (Figure 5) | 72.5 | 44.9 | 68.4 | 46.8 | 44.6 | 50.1 | 10.5 | 30.8 |
| *CL.general N.human-men | (Figure 5) | 61.7 | 48.9 | 59.2 | 49.5 | 29.7 | 46.0 | 7.89 | 27.1 |
| D CL.human              | (Figure 6) | 87.2 | 33.7 | 93.4 | 25.0 | 96.0 | 19.7 | 96.5 | 18.4 |
| D CL.general            | (Figure 6) | 89.7 | 30.5 | 91.9 | 27.8 | 90.7 | 29.3 | 93.0 | 25.7 |
| D CL.animate            | (Figure 6) | 85.9 | 35.0 | 96.0 | 19.7 | 90.5 | 29.5 | 93.9 | 24.0 |
| D CL.inanimate          | (Figure 6) | 84.3 | 36.6 | 97.3 | 16.3 | 97.3 | 16.3 | 99.1 | 9.33 |
| *D-xie CL.human         | (Figure 6) | 70.5 | 45.9 | 62.2 | 48.8 | 27.8 | 45.1 | 2.61 | 16.0 |
| *D-xie CL.general       | (Figure 6) | 68.8 | 46.6 | 49.3 | 50.3 | 25.4 | 43.8 | 0    | 0    |
| *D-xie CL.animate       | (Figure 6) | 68.4 | 46.8 | 54.3 | 50.2 | 21.9 | 41.7 | 0    | 0    |
| *D-xie CL.inanimate     | (Figure 6) | 71.1 | 45.6 | 54.1 | 50.2 | 18.3 | 39.0 | 0.87 | 9.32 |
